# Supplementary material
Source: PubMed Central journal article supplement (PMC8238808)

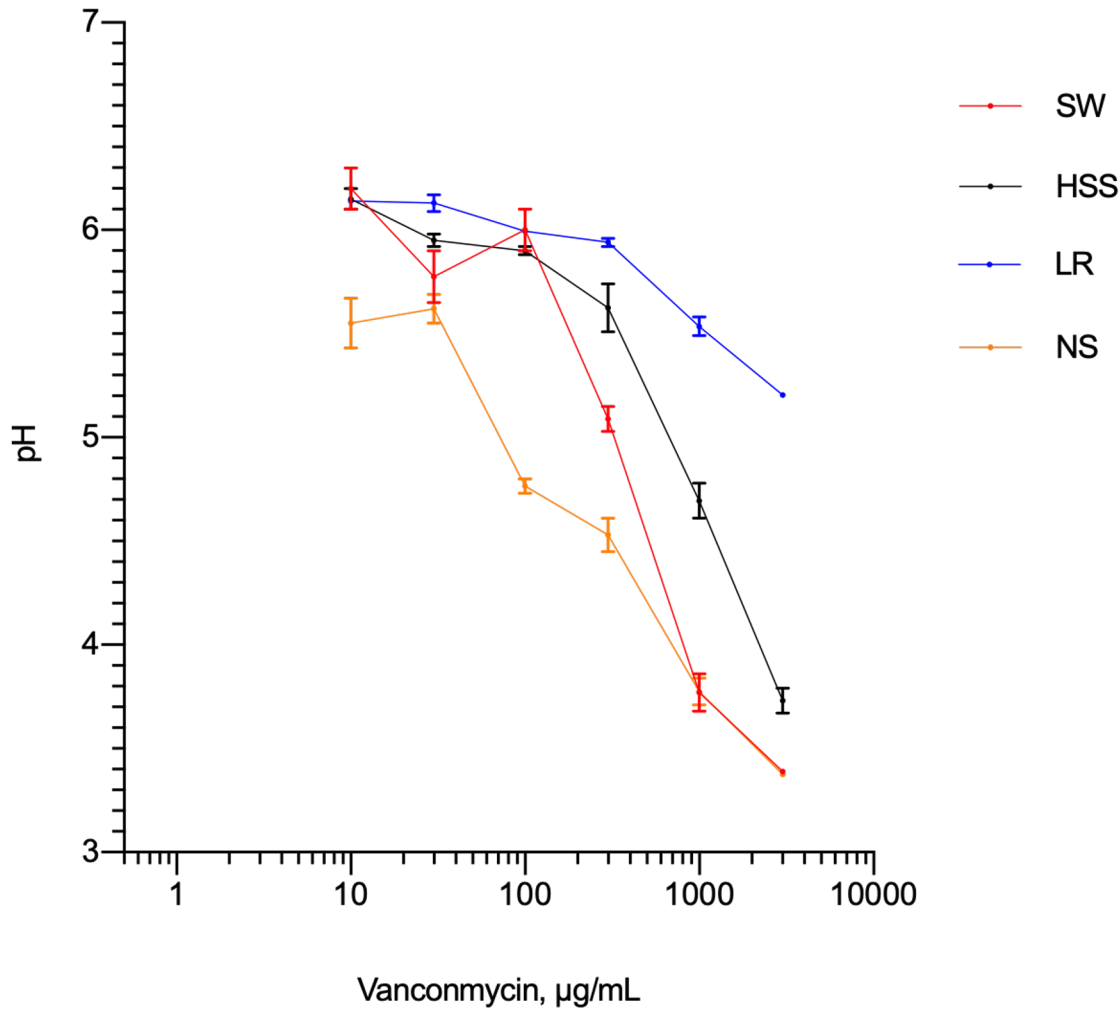

Supplement: NIHMS1676199-supplement-FIG_S1.pdf [file NIHMS1676199-supplement-FIG_S1.pdf]
